# Supplementary material
Source: PubMed Central journal article supplement (PMC4598280)

## **Supplemental Experimental Procedures**

### *Fasting Studies; Plasma and Liver Metabolite Analysis*

Age and sex matched mice were randomly divided into *ad libitum* chow fed or fasting groups. The fasting period was 24 h from 09:00 – 09:00. Blood glucose and lactate were measured at the beginning and end of the fasting period. Mice were subsequently sacrificed by asphyxiation with CO<sub>2</sub>, and plasma was collected from the inferior vena cava, and stored on ice with EDTA to prevent clotting. Blood was then centrifuged at 8,000 x g for 8 min to separate cells and plasma. Livers were frozen in liquid nitrogen and stored at -80°C for later analysis.

Plasma triglyceride and cholesterol concentrations were measured by Infinity colorimetric assay kits (Thermo Fisher Scientific). Plasma non-esterified fatty acids and total ketone concentrations were measured using enzymatic assays (Wako Diagnostics). Plasma urea was assessed by a commercial assay kit (Abnova). Plasma insulin was measured by an immunoassay (Singulex) by the Core Laboratory for Clinical Studies at Washington University. Liver triglyceride was measured by solubilizing 100 mg liver tissue in saline and solubilizing lipid with 0.5% sodium deoxycholate. Liver TAG was then determined by colorimetric assay (Thermo Fisher Scientific). Liver glycogen was measured by colorimetric assay (Sigma).

### *Metabolic Tolerance Tests and Streptozotocin-Induced Insulin Deficiency*

Pyruvate tolerance tests (PTT), alanine tolerance tests (ATT), and glucose tolerance tests (GTT) were performed after an overnight (16 h) fast and while housed on aspen chip bedding. Mice were injected i.p. with 2 g/kg body weight Na-pyruvate (PTT), 2 g/kg body weight L-alanine (ATT), or 1 g/kg body weight D-glucose (GTT) dissolved in sterile saline. Insulin tolerance tests were performed by injecting i.p. 0.75 U/kg body weight insulin (Humulin), after a short 2 h fast. For all tolerance tests, blood glucose and lactate were measured using a One-Touch Ultra

glucometer (LifeScan) and a Lactate Plus lactate meter (Nova Biomedical), respectively with a single drop of tail blood at T= 0, 15, 30, 60, 90, and 120 minutes after challenge. GTT and ITT in db/db crossed mice were performed similarly, but after 4 h fast.

A subset of mice was injected with a single dose of 180 µg/g body weight streptozotocin (STZ; Santa Cruz Biotechnology) to render mice insulin-deficient. Blood glucose and lactate was measured daily pre-STZ injection and for six days following STZ injection at 15:00.

#### *Pyruvate and Alanine Mitochondrial Transport Assays*

Mitochondria were isolated from fresh mouse livers by differential centrifugation and resuspended in assay buffer containing 120 mM KCl, 1 mM EGTA, 5 mM KH<sub>2</sub>PO<sub>4</sub>, and 10 mM HEPES, pH 7.4. Measurements of pyruvate or alanine uptake of the isolated mitochondria were performed in 100 µl assay buffer containing 50-100 µg mitochondrial protein, 2 µM of <sup>14</sup>C-pyruvate or <sup>3</sup>H-alanine for 3 min at room temperature. The mitochondrial-bound <sup>14</sup>C-pyruvate and <sup>3</sup>H-alanine were separated from the reactants by filtration through a nitrocellulose membrane filter (0.2 µm) and repeated washing with ice cold assay buffer. <sup>14</sup>C-pyruvate and <sup>3</sup>H-alanine radioactivity in the nitrocellulose filters were determined by scintillation counting. Non-specific uptake of <sup>14</sup>C-pyruvate and <sup>3</sup>H-alanine were determined by pretreatment of a subset of mitochondria with either 20 µM UK-5099 to inhibit MPC activity or 500 µM unlabeled alanine to limit <sup>3</sup>H-alanine uptake. Specific uptake was expressed as DPM/mg/min.

#### *Hepatocyte Glucose Production Assay*

All experiments were performed 10-12 hours after the hepatocytes were plated. To determine rates of glucose production, hepatocytes were washed twice with PBS and then incubated for 2 h

in Hank's balanced salt solution (HBSS) containing 127mM NaCl, 3.5 mM KCl, 0.44 mM  $\text{KH}_2\text{PO}_4$ , 4.2 mM  $\text{NaHCO}_3$ , 0.33 mM  $\text{Na}_2\text{HPO}_4$ , 1 mM  $\text{CaCl}_2$ , 20 mM HEPES, pH 7.4. Media was removed and hepatocytes were washed with fresh HBSS, and incubated for 3 h in HBSS containing glucagon (100 ng/ml) alone or with 5 mM sodium pyruvate in the absence or presence of either 2.5  $\mu\text{M}$  UK-5099, 15  $\mu\text{M}$  MSDC-0602, or 500  $\mu\text{M}$  amino-oxyacetate (AOA). At the end of this incubation period, the media was collected and assayed for glucose concentrations with a glucose oxidase-based glucose assay kit (Sigma). Rates of glucose production were expressed as  $\mu\text{g}$  glucose/mg cell protein/h.

#### *Quantitative RT-PCR*

Total RNA was isolated using the RNazol method (RNA-Bee, Tel-Test). cDNA was made by use of a reverse transcription kit (Invitrogen), and real-time PCR was performed using an ABI PRISM 7500 sequence detection system (Applied Biosystems) and a SYBR green master mix. Arbitrary units of target mRNA were corrected by measuring the levels of *36B4* mRNA. The sequences of the oligonucleotides are available upon request.

#### *Western Blotting*

Whole-cell lysates from tissue or isolated primary hepatocytes were collected in HNET buffer containing protease and phosphatase inhibitors. Lysates were normalized to protein concentration, denatured, and run down Criterion precast PAGE gels (BioRad). Antibodies used were  $\alpha$ -Tubulin (Sigma), and MPC1 and MPC2 (gifts from Michael Wolfgang).

### *Palmitate Oxidation Measurement*

Palmitate oxidation rates were assessed in lysates from primary hepatocytes using [<sup>3</sup>H]palmitate as previously described (Chen et al., 2008).

### *Mitochondrial Respiration and Membrane Potential*

Isolated primary hepatocytes were permeabilized with digitonin, and high-resolution respirometry was conducted using an Oxygraph O2k (Oroboros Instruments). 0.5 x 10<sup>6</sup> cells was suspended in 2 mL respiration for each trace. Respiratory substrates utilized were 5 mM pyruvate/2 mM malate, 10 mM glutamate/2 mM malate, or 5 mM succinate with 0.5 μM rotenone. All substrates were used in the presence of 2 mM ADP.

Respiration was performed with the same substrate concentrations as above with 50 μg of mitochondria isolated by differential centrifugation. 15 μM MSDC-0602 and 10 μM UK-5099 were used to inhibit pyruvate-stimulated respiration.

Mitochondrial membrane potential was assessed by plating isolated hepatocytes onto Tissue-Tek chamber slides, and staining with 100 nM tetramethylrhodamine, ethyl ester, perchlorate (TMRE) in HBSS for 30 min. Hepatocytes were then washed twice with HBSS and imaged on an inverted fluorescence microscope (Nikon Instruments). Average TMRE fluorescence per cell was determined with ImageJ (NIH).

### **References Cited**

Chen, Z., Gropler, M.C., Norris, J., Lawrence, J.C., Jr., Harris, T.E., and Finck, B.N. (2008). Alterations in hepatic metabolism in fld mice reveal a role for lipin 1 in regulating VLDL-triacylglyceride secretion. *Arterioscler Thromb Vasc Biol* 28, 1738-1744.

## SUPPLEMENTAL FIGURE LEGENDS

### **Supplemental Figure 1, related to Figure 1 and Figure 2, further characterization of LS-*Mpc2*<sup>-/-</sup> mice.**

(A) Body weights of 13 week old mice. (B) Relative liver weights of 13 week old mice. (C) Indirect calorimetry, energy expenditure, spontaneous activity, and H<sub>2</sub>O/food consumption as measured in Phenomaster metabolic cages. (D) Blood glucose concentrations during an i.p. glucose tolerance test (GTT) after an overnight fast. (E) Blood lactate concentrations during the GTT. (F) Blood glucose concentrations during an i.p. insulin tolerance test (ITT) after a 2 h fast. (G) Blood lactate concentrations during the ITT. Data expressed as mean ± S.E.M. \*p ≤ 0.05 for fl/fl vs. LS-*Mpc2*<sup>-/-</sup>. †p ≤ 0.05 for light vs. dark.

### **Supplemental Figure 2, related to Figure 3, body and tissue weights and blood lactates or LS-*Mpc2*<sup>-/-</sup> mice crossed into the db/db background.**

(A) Weekly body weights of fl/fl and LS-*Mpc2*<sup>-/-</sup> mice crossed into the db/db background. (B) Gonadal white adipose tissue (WAT) and (C) subcutaneous WAT weights from mice crossed into the db/db background. (D) Relative liver weights and (E) liver triglyceride content from mice crossed into dbdb background. (F) Weekly blood lactate concentrations of fl/fl and LS-*Mpc2*<sup>-/-</sup> mice crossed into the db/db background. Data expressed as mean ± S.E.M. \*p ≤ 0.05 for fl/fl vs. LS-*Mpc2*<sup>-/-</sup>. †p ≤ 0.05 for dbWT vs. dbdb.

**Table S1. Hepatocyte cellular organic and amino acid and extracellular glucose U-<sup>13</sup>C-pyruvate isotopomers with MPC inhibition, related to experiments in Figure 2.**

| Metabolite   | Genotype               | Treatment | Isotopomer Distribution |               |                |                |               |               |               |  | Concentration |  |    |  |                 |  |
|--------------|------------------------|-----------|-------------------------|---------------|----------------|----------------|---------------|---------------|---------------|--|---------------|--|----|--|-----------------|--|
|              |                        |           | M0                      |               | M1             |                | M2            |               | M3            |  | M4            |  | M5 |  | M6              |  |
| Lactate      | fl/fl                  | Vehicle   | 74.80 ± 0.77            | 2.88 ± 0.15   | 3.70 ± 0.14    | 19.13 ± 0.73   |               |               |               |  |               |  |    |  | 611.81 ± 20.67  |  |
|              |                        | UK-5099   | 72.81 ± 0.37            | 2.33 ± 0.25   | 2.94 ± 0.15    | 21.92 ± 0.78   |               |               |               |  |               |  |    |  | 772.92 ± 206.24 |  |
|              |                        | MSDC-0602 | 72.64 ± 0.35            | 2.04 ± 0.55   | 3.28 ± 0.37    | 22.05 ± 0.57   |               |               |               |  |               |  |    |  | 577.82 ± 2.63   |  |
|              | LS-Mpc2 <sup>-/-</sup> | Vehicle   | 74.74 ± 1.82            | 2.34 ± 0.22   | 3.35 ± 0.17    | 20.57 ± 0.42   |               |               |               |  |               |  |    |  | 622.09 ± 3.93   |  |
|              |                        | UK-5099   | 73.57 ± 0.38            | 1.73 ± 0.40   | 2.59 ± 0.20    | 22.11 ± 0.23   |               |               |               |  |               |  |    |  | 839.12 ± 193.97 |  |
|              |                        | MSDC-0602 | 74.26 ± 0.11            | 2.06 ± 0.14   | 3.09 ± 0.22    | 20.59 ± 0.48   |               |               |               |  |               |  |    |  | 639.94 ± 54.19  |  |
| Pyruvate     | fl/fl                  | Vehicle   | 66.65 ± 1.77            | 6.69 ± 0.22   | 11.05 ± 0.32   | 15.61 ± 2.31   |               |               |               |  |               |  |    |  | 137.31 ± 21.68  |  |
|              |                        | UK-5099   | 58.07 ± 1.55†           | 5.18 ± 0.23†  | 6.55 ± 0.16†   | 30.19 ± 1.94†  |               |               |               |  |               |  |    |  | 188.02 ± 7.92   |  |
|              |                        | MSDC-0602 | 54.18 ± 2.39†           | 7.70 ± 0.30   | 10.89 ± 0.23   | 27.24 ± 1.85†  |               |               |               |  |               |  |    |  | 179.05 ± 15.79  |  |
|              | LS-Mpc2 <sup>-/-</sup> | Vehicle   | 67.20 ± 1.92            | 4.25 ± 0.56*  | 6.07 ± 0.25*   | 22.48 ± 2.72*  |               |               |               |  |               |  |    |  | 189.71 ± 52.04  |  |
|              |                        | UK-5099   | 57.29 ± 3.44            | 4.45 ± 0.23   | 6.12 ± 0.01    | 32.15 ± 3.21   |               |               |               |  |               |  |    |  | 273.07 ± 2.65*  |  |
|              |                        | MSDC-0602 | 59.20 ± 1.59†           | 3.87 ± 0.50*  | 5.36 ± 0.36*   | 31.57 ± 2.45   |               |               |               |  |               |  |    |  | 270.58 ± 10.20* |  |
| Citrate      | fl/fl                  | Vehicle   | 30.65 ± 2.42            | 7.61 ± 0.22   | 25.09 ± 1.07   | 19.32 ± 0.21   | 9.17 ± 0.80   | 7.21 ± 0.40   | 0.97 ± 0.14   |  |               |  |    |  | 1336.06 ± 82.39 |  |
|              |                        | UK-5099   | 42.06 ± 1.47†           | 9.79 ± 0.23†  | 23.13 ± 0.67   | 15.93 ± 0.12†  | 5.45 ± 0.38†  | 3.41 ± 0.41†  | 0.24 ± 0.12†  |  |               |  |    |  | 575.06 ± 14.31† |  |
|              |                        | MSDC-0602 | 30.86 ± 1.70            | 8.21 ± 0.38   | 26.37 ± 0.69   | 18.03 ± 0.22†  | 9.22 ± 0.70   | 6.53 ± 0.76   | 0.79 ± 0.15   |  |               |  |    |  | 835.28 ± 3.75†  |  |
|              | LS-Mpc2 <sup>-/-</sup> | Vehicle   | 38.69 ± 0.13            | 9.38 ± 0.14*  | 23.83 ± 0.21   | 17.67 ± 0.63   | 6.10 ± 0.03   | 4.17 ± 0.53*  | 0.15 ± 0.07*  |  |               |  |    |  | 480.50 ± 11.25* |  |
|              |                        | UK-5099   | 37.42 ± 1.80            | 9.47 ± 1.30   | 24.91 ± 1.15   | 16.44 ± 0.37   | 7.39 ± 0.68   | 3.98 ± 0.90   | 0.40 ± 0.01†  |  |               |  |    |  | 365.16 ± 5.72*† |  |
|              |                        | MSDC-0602 | 42.89 ± 0.40*†          | 10.85 ± 0.94  | 24.07 ± 1.68   | 13.58 ± 0.66*† | 5.53 ± 0.03*† | 2.89 ± 0.22*  | 0.19 ± 0.06*  |  |               |  |    |  | 374.59 ± 33.06* |  |
| Succinate    | fl/fl                  | Vehicle   | 90.60 ± 1.55            | 2.03 ± 0.25   | 4.90 ± 0.79    | 1.05 ± 0.21    | 1.42 ± 0.30   |               |               |  |               |  |    |  | 472.49 ± 8.63   |  |
|              |                        | UK-5099   | 93.04 ± 1.27            | 2.42 ± 0.37   | 3.52 ± 0.66    | 0.48 ± 0.09†   | 0.54 ± 0.16†  |               |               |  |               |  |    |  | 445.14 ± 15.52  |  |
|              |                        | MSDC-0602 | 92.43 ± 0.38            | 1.92 ± 0.10   | 3.78 ± 0.27    | 0.90 ± 0.09    | 0.97 ± 0.12   |               |               |  |               |  |    |  | 432.36 ± 8.44†  |  |
|              | LS-Mpc2 <sup>-/-</sup> | Vehicle   | 94.91 ± 0.01            | 1.84 ± 0.22   | 2.37 ± 0.13*   | 0.44 ± 0.03*   | 0.44 ± 0.04*  |               |               |  |               |  |    |  | 380.94 ± 2.92*  |  |
|              |                        | UK-5099   | 92.40 ± 0.70            | 2.58 ± 0.26   | 3.52 ± 0.63    | 0.73 ± 0.11    | 0.76 ± 0.21   |               |               |  |               |  |    |  | 398.22 ± 6.06   |  |
|              |                        | MSDC-0602 | 91.62 ± 0.20†           | 3.39 ± 0.19*† | 3.80 ± 0.02†   | 0.56 ± 0.02†   | 0.62 ± 0.03†  |               |               |  |               |  |    |  | 412.14 ± 0.91†  |  |
| Malate       | fl/fl                  | Vehicle   | 42.07 ± 0.15            | 12.09 ± 0.07  | 21.36 ± 0.12   | 18.26 ± 0.21   | 6.22 ± 0.25   |               |               |  |               |  |    |  | 467.18 ± 51.53  |  |
|              |                        | UK-5099   | 58.31 ± 0.89†           | 12.75 ± 0.14† | 15.81 ± 0.44†  | 9.67 ± 0.32†   | 3.45 ± 0.28†  |               |               |  |               |  |    |  | 177.80 ± 35.31† |  |
|              |                        | MSDC-0602 | 48.21 ± 0.15†           | 12.18 ± 0.71  | 19.80 ± 0.40   | 14.09 ± 0.08†  | 5.72 ± 0.54   |               |               |  |               |  |    |  | 244.24 ± 24.55† |  |
|              | LS-Mpc2 <sup>-/-</sup> | Vehicle   | 53.12 ± 0.39*           | 12.44 ± 0.69  | 17.11 ± 0.01*  | 12.57 ± 0.10*  | 4.76 ± 0.99   |               |               |  |               |  |    |  | 146.05 ± 10.61* |  |
|              |                        | UK-5099   | 55.06 ± 0.39†           | 12.74 ± 1.04  | 17.06 ± 0.42   | 10.58 ± 0.16†  | 4.56 ± 0.07   |               |               |  |               |  |    |  | 136.49 ± 8.43   |  |
|              |                        | MSDC-0602 | 59.20 ± 1.93            | 12.79 ± 1.25  | 14.90 ± 0.28*† | 8.97 ± 0.04*†  | 4.13 ± 0.36   |               |               |  |               |  |    |  | 135.98 ± 1.74*  |  |
| αKG          | fl/fl                  | Vehicle   | 56.13 ± 5.00            | 6.61 ± 2.03   | 17.79 ± 4.72   | 8.32 ± 2.60    | 8.19 ± 0.44   | 2.96 ± 1.10   |               |  |               |  |    |  | 19.15 ± 3.76    |  |
|              |                        | UK-5099   | 66.42 ± 3.10†           | 5.43 ± 1.40   | 16.12 ± 0.38   | 6.74 ± 0.84    | 3.32 ± 0.39†  | 1.97 ± 0.08   |               |  |               |  |    |  | 11.06 ± 0.49    |  |
|              |                        | MSDC-0602 | 53.51 ± 6.37            | 6.18 ± 1.40   | 21.66 ± 2.76   | 9.80 ± 0.79    | 5.74 ± 0.46†  | 3.12 ± 0.97   |               |  |               |  |    |  | 11.47 ± 0.12    |  |
|              | LS-Mpc2 <sup>-/-</sup> | Vehicle   | 69.65 ± 1.11            | 5.97 ± 2.29   | 13.28 ± 0.79   | 5.26 ± 2.18    | 4.52 ± 0.73*  | 1.32 ± 0.53   |               |  |               |  |    |  | 8.65 ± 0.70*    |  |
|              |                        | UK-5099   | 64.62 ± 5.01            | 6.09 ± 0.73   | 15.84 ± 2.05   | 7.18 ± 1.64    | 4.23 ± 0.26   | 2.04 ± 0.34   |               |  |               |  |    |  | 10.20 ± 0.02    |  |
|              |                        | MSDC-0602 | 73.08 ± 1.25            | 3.74 ± 1.72   | 13.67 ± 1.20   | 3.52 ± 0.27*   | 3.27 ± 0.67   | 2.71 ± 0.21   |               |  |               |  |    |  | 11.96 ± 1.56    |  |
| Alanine      | fl/fl                  | Vehicle   | 50.65 ± 0.21            | 4.54 ± 0.25   | 6.66 ± 0.03    | 39.67 ± 0.02   |               |               |               |  |               |  |    |  | 2.83 ± 0.01     |  |
|              |                        | UK-5099   | 55.16 ± 0.59†           | 3.73 ± 0.27   | 4.39 ± 0.18†   | 38.21 ± 1.07   |               |               |               |  |               |  |    |  | 1.40 ± 0.03†    |  |
|              |                        | MSDC-0602 | 51.63 ± 0.40            | 3.26 ± 0.62   | 5.04 ± 0.66    | 41.66 ± 1.67   |               |               |               |  |               |  |    |  | 3.16 ± 0.12     |  |
|              | LS-Mpc2 <sup>-/-</sup> | Vehicle   | 53.51 ± 0.09*           | 4.03 ± 0.15   | 5.19 ± 0.19*   | 38.73 ± 0.24   |               |               |               |  |               |  |    |  | 2.45 ± 0.25     |  |
|              |                        | UK-5099   | 53.53 ± 1.06            | 3.24 ± 0.58   | 3.99 ± 0.51    | 40.76 ± 2.23   |               |               |               |  |               |  |    |  | 1.54 ± 0.06     |  |
|              |                        | MSDC-0602 | 55.17 ± 0.33*           | 4.11 ± 0.37   | 4.74 ± 0.30*   | 37.54 ± 1.05   |               |               |               |  |               |  |    |  | 2.08 ± 0.12*    |  |
| Aspartate    | fl/fl                  | Vehicle   | 39.07 ± 0.52            | 11.22 ± 0.06  | 22.13 ± 0.21   | 20.86 ± 0.07   | 6.72 ± 0.19   |               |               |  |               |  |    |  | 7.01 ± 0.27     |  |
|              |                        | UK-5099   | 55.06 ± 0.57†           | 11.95 ± 0.21  | 17.17 ± 0.31†  | 12.35 ± 0.42†  | 3.46 ± 0.05†  |               |               |  |               |  |    |  | 2.05 ± 0.06†    |  |
|              |                        | MSDC-0602 | 44.31 ± 0.54†           | 11.99 ± 0.51  | 21.31 ± 1.04   | 16.52 ± 0.41†  | 5.87 ± 0.42   |               |               |  |               |  |    |  | 4.44 ± 0.59†    |  |
|              | LS-Mpc2 <sup>-/-</sup> | Vehicle   | 44.72 ± 0.37*           | 12.97 ± 0.29* | 20.67 ± 0.16*  | 16.79 ± 0.16*  | 4.85 ± 0.08*  |               |               |  |               |  |    |  | 2.46 ± 0.09*    |  |
|              |                        | UK-5099   | 49.51 ± 0.23*†          | 12.23 ± 0.84  | 19.62 ± 0.66   | 13.98 ± 0.08†  | 4.67 ± 0.33   |               |               |  |               |  |    |  | 1.43 ± 0.11*†   |  |
|              |                        | MSDC-0602 | 52.39 ± 0.86*†          | 13.37 ± 0.92  | 18.28 ± 0.17†  | 12.17 ± 0.20*† | 3.78 ± 0.03†  |               |               |  |               |  |    |  | 1.54 ± 0.03*†   |  |
| Glucose (μM) | fl/fl                  | Vehicle   | 24.42 ± 0.09            | 11.93 ± 0.05  | 22.42 ± 0.01   | 21.21 ± 0.04   | 9.46 ± 0.01   | 7.90 ± 0.20   | 2.66 ± 0.00   |  |               |  |    |  | 170.04 ± 1.10   |  |
|              |                        | UK-5099   | 33.63 ± 0.70†           | 12.92 ± 0.18† | 20.55 ± 0.23†  | 18.53 ± 0.17†  | 7.22 ± 0.05†  | 5.38 ± 0.06†  | 1.79 ± 0.02†  |  |               |  |    |  | 114.47 ± 4.02†  |  |
|              |                        | MSDC-0602 | 28.20 ± 0.30†           | 12.55 ± 0.13† | 21.93 ± 0.01†  | 20.13 ± 0.08†  | 8.38 ± 0.09†  | 6.64 ± 0.03†  | 2.17 ± 0.04†  |  |               |  |    |  | 130.93 ± 4.85†  |  |
|              | LS-Mpc2 <sup>-/-</sup> | Vehicle   | 29.00 ± 0.04*           | 12.33 ± 0.09* | 21.37 ± 0.05*  | 20.10 ± 0.02*  | 8.21 ± 0.03*  | 6.69 ± 0.00*  | 2.29 ± 0.05*  |  |               |  |    |  | 124.17 ± 3.45*  |  |
|              |                        | UK-5099   | 34.49 ± 2.07            | 12.28 ± 0.42  | 19.79 ± 0.56   | 19.78 ± 0.13*  | 7.52 ± 0.25   | 5.58 ± 0.25   | 2.06 ± 0.03*† |  |               |  |    |  | 107.59 ± 5.14   |  |
|              |                        | MSDC-0602 | 35.04 ± 0.03*†          | 12.31 ± 0.35  | 19.82 ± 0.14*† | 18.11 ± 0.19*† | 7.10 ± 0.12*† | 5.60 ± 0.04*† | 2.02 ± 0.19*  |  |               |  |    |  | 119.86 ± 6.60   |  |

\*  $p < 0.05$  WT vs KO within treatment

†  $p < 0.05$  Vehicle vs treatment within genotype

**Table S2. Plasma and liver characteristics in vehicle or STZ-injected mice, related to Figure 3.**

|                              | Vehicle      |                              | Streptozotocin            |                              |
|------------------------------|--------------|------------------------------|---------------------------|------------------------------|
|                              | <u>fl/fl</u> | <u>LS-Mpc2<sup>-/-</sup></u> | <u>fl/fl</u>              | <u>LS-Mpc2<sup>-/-</sup></u> |
| Plasma Insulin (pg/mL)       | 573.0 ± 91.9 | 661.5 ± 66.1                 | 146.9 ± 22.4 <sup>†</sup> | 140.9 ± 17.3 <sup>†</sup>    |
| Plasma Free Fatty Acids (mM) | 0.62 ± 0.13  | 0.85 ± 0.15                  | 1.59 ± 0.24 <sup>†</sup>  | 1.10 ± 0.10                  |
| Plasma Total Ketones (mM)    | 0.14 ± 0.03  | 0.27 ± 0.07                  | 0.67 ± 0.21 <sup>†</sup>  | 0.52 ± 0.08 <sup>†</sup>     |
| Plasma TAG (mg/dL)           | 41.1 ± 5.23  | 32.8 ± 3.8                   | 152.9 ± 34.0 <sup>†</sup> | 89.1 ± 17.5 <sup>†</sup>     |
| Plasma Cholesterol (mg/dL)   | 64.1 ± 4.4   | 55.2 ± 3.0                   | 95.6 ± 14.4 <sup>†</sup>  | 67.8 ± 1.3 <sup>†</sup>      |

<sup>†</sup> p < 0.05 Saline vehicle vs Streptozotocin

**Table S3. Plasma and liver characteristics and liver Glutaminolysis and TCA cycle gene expression in fed and fasted mice, related to Figure 4.**

|                                                                                 |              | ad-lib fed   |                              | 24 h fast                 |                              |
|---------------------------------------------------------------------------------|--------------|--------------|------------------------------|---------------------------|------------------------------|
|                                                                                 |              | <u>fl/fl</u> | <u>LS-Mpc2<sup>-/-</sup></u> | <u>fl/fl</u>              | <u>LS-Mpc2<sup>-/-</sup></u> |
| Plasma Insulin (pg/mL)                                                          |              | 708.1 ± 83.2 | 631.3 ± 121.3                | 183.5 ± 32.7 <sup>†</sup> | 174.8 ± 44.6 <sup>†</sup>    |
| Plasma Free Fatty Acids (mM)                                                    |              | 0.51 ± 0.05  | 0.53 ± 0.12                  | 1.15 ± 0.18 <sup>†</sup>  | 1.36 ± 0.13 <sup>†</sup>     |
| Plasma Total Ketones (mM)                                                       |              | 0.12 ± 0.01  | 0.20 ± 0.06                  | 1.36 ± 0.14 <sup>†</sup>  | 1.55 ± 0.20 <sup>†</sup>     |
| Plasma TAG (mg/dL)                                                              |              | 62.6 ± 14.3  | 61.8 ± 7.1                   | 53.8 ± 7.7                | 74.4 ± 5.9*                  |
| Plasma Cholesterol (mg/dL)                                                      |              | 66.8 ± 3.6   | 70.9 ± 2.7                   | 74.7 ± 4.6                | 81.0 ± 3.1 <sup>†</sup>      |
| Plasma Urea (mM)                                                                |              | 14.26 ± 0.68 | 15.23 ± 0.90                 | 18.13 ± 1.42 <sup>†</sup> | 17.40 ± 1.49                 |
| Liver TAG (µg/mg wet wt)                                                        |              | 3.34 ± 0.37  | 2.99 ± 0.39                  | 25.69 ± 4.53 <sup>†</sup> | 32.05 ± 2.72 <sup>†</sup>    |
| Hepatic Expression of genes encoding enzymes in glutaminolysis or the TCA cycle | <i>Gls1</i>  | 1.0 ± 0.07   | 1.13 ± 0.12                  | 1.30 ± 0.22               | 1.56 ± 0.16                  |
|                                                                                 | <i>Gls2</i>  | 1.0 ± 0.06   | 1.12 ± 0.11                  | 1.30 ± 0.20               | 1.22 ± 0.16                  |
|                                                                                 | <i>Glud1</i> | 1.0 ± 0.05   | 1.07 ± 0.05                  | 1.01 ± 0.13               | 1.05 ± 0.09                  |
|                                                                                 | <i>Ogdh</i>  | 1.0 ± 0.12   | 0.98 ± 0.04                  | 1.77 ± 0.06 <sup>†</sup>  | 2.61 ± 0.36 <sup>†</sup>     |
|                                                                                 | <i>Sdha</i>  | 1.0 ± 0.08   | 1.05 ± 0.09                  | 1.03 ± 0.16               | 1.55 ± 0.13* <sup>†</sup>    |
|                                                                                 | <i>Mdh2</i>  | 1.0 ± 0.11   | 0.83 ± 0.09                  | 1.69 ± 0.25 <sup>†</sup>  | 1.54 ± 0.12 <sup>†</sup>     |
|                                                                                 | <i>Cs</i>    | 1.0 ± 0.07   | 0.93 ± 0.07                  | 0.99 ± 0.15               | 1.06 ± 0.10                  |
|                                                                                 | <i>Idh2</i>  | 1.0 ± 0.09   | 1.06 ± 0.06                  | 1.45 ± 0.15 <sup>†</sup>  | 2.86 ± 0.46* <sup>†</sup>    |

\* p < 0.05 fl/fl vs LS-Mpc2<sup>-/-</sup>

† p < 0.05 fed vs fasted



**Table S5. Hepatocyte cellular organic and amino acids and extracellular glucose U-<sup>13</sup>C-pyruvate isotopomers with ALT inhibition, related to experiment in Figure 7.**

| Metabolite   | Genotype               | Treatment | Isotopomer Distribution |                |                |                |               |               |               |  |    |  | Concentration |  |    |                  |         |
|--------------|------------------------|-----------|-------------------------|----------------|----------------|----------------|---------------|---------------|---------------|--|----|--|---------------|--|----|------------------|---------|
|              |                        |           | M0                      |                | M1             |                | M2            |               | M3            |  | M4 |  | M5            |  | M6 |                  | (ng/mL) |
| Lactate      | fl/fl                  | Vehicle   | 84.28 ± 5.83            | 2.03 ± 0.62    | 2.63 ± 0.79    | 11.31 ± 4.66   |               |               |               |  |    |  |               |  |    | 597.35 ± 16.21   |         |
|              |                        | AOA       | 82.23 ± 3.10            | 2.74 ± 0.28    | 3.26 ± 0.68    | 11.76 ± 2.26   |               |               |               |  |    |  |               |  |    | 529.87 ± 32.64   |         |
|              | LS-Mpc2 <sup>-/-</sup> | Vehicle   | 82.01 ± 4.28            | 1.87 ± 0.29    | 2.53 ± 0.49    | 16.34 ± 2.45   |               |               |               |  |    |  |               |  |    | 606.87 ± 8.94    |         |
|              |                        | AOA       | 75.54 ± 1.88            | 1.09 ± 0.08*†  | 1.35 ± 0.15*†  | 22.02 ± 1.72†  |               |               |               |  |    |  |               |  |    | 721.70 ± 90.90   |         |
| Pyruvate     | fl/fl                  | Vehicle   | 60.01 ± 4.27            | 9.02 ± 1.44    | 14.06 ± 1.90   | 16.91 ± 1.29   |               |               |               |  |    |  |               |  |    | 138.86 ± 9.13    |         |
|              |                        | AOA       | 50.84 ± 1.71            | 6.34 ± 1.70    | 9.12 ± 2.13    | 33.70 ± 2.14†  |               |               |               |  |    |  |               |  |    | 222.90 ± 30.68†  |         |
|              | LS-Mpc2 <sup>-/-</sup> | Vehicle   | 63.21 ± 2.49            | 6.16 ± 1.20    | 8.50 ± 1.52*   | 22.13 ± 1.88*  |               |               |               |  |    |  |               |  |    | 135.88 ± 37.67   |         |
|              |                        | AOA       | 54.86 ± 0.11†           | 1.33 ± 0.08*†  | 1.72 ± 0.06*†  | 41.85 ± 0.38*† |               |               |               |  |    |  |               |  |    | 301.76 ± 66.78†  |         |
| Citrate      | fl/fl                  | Vehicle   | 30.88 ± 1.07            | 8.23 ± 0.38    | 24.67 ± 0.52   | 20.05 ± 0.44   | 8.82 ± 0.39   | 6.56 ± 0.41   | 0.79 ± 0.12   |  |    |  |               |  |    | 1051.43 ± 168.45 |         |
|              |                        | AOA       | 36.18 ± 5.85            | 8.18 ± 0.71    | 23.80 ± 2.20   | 16.50 ± 1.69   | 8.62 ± 0.94   | 6.02 ± 0.48   | 0.69 ± 0.08   |  |    |  |               |  |    | 917.03 ± 77.68   |         |
|              | LS-Mpc2 <sup>-/-</sup> | Vehicle   | 42.17 ± 2.03*           | 9.62 ± 0.16*   | 21.76 ± 1.20*  | 18.84 ± 0.73   | 4.57 ± 0.89*  | 3.00 ± 0.71*  | 0.04 ± 0.09*  |  |    |  |               |  |    | 425.84 ± 34.44*  |         |
|              |                        | AOA       | 67.22 ± 1.71*†          | 11.25 ± 0.42*† | 12.56 ± 1.1*†  | 6.26 ± 0.4*†   | 1.13 ± 0.18*† | 1.37 ± 0.17*  | 0.20 ± 0.05*  |  |    |  |               |  |    | 243.66 ± 45.42*† |         |
| Succinate    | fl/fl                  | Vehicle   | 89.55 ± 0.88            | 2.58 ± 0.34    | 5.30 ± 0.39    | 1.10 ± 0.09    | 1.47 ± 0.13   |               |               |  |    |  |               |  |    | 525.46 ± 30.79   |         |
|              |                        | AOA       | 89.55 ± 0.81            | 2.86 ± 0.13    | 4.99 ± 0.40    | 1.17 ± 0.13    | 1.44 ± 0.15   |               |               |  |    |  |               |  |    | 496.20 ± 44.35   |         |
|              | LS-Mpc2 <sup>-/-</sup> | Vehicle   | 93.97 ± 0.55*           | 2.29 ± 0.29    | 2.94 ± 0.34*   | 0.38 ± 0.04*   | 0.42 ± 0.03*  |               |               |  |    |  |               |  |    | 467.05 ± 49.83   |         |
|              |                        | AOA       | 97.19 ± 0.24*†          | 1.55 ± 0.10*†  | 1.09 ± 0.12*†  | 0.13 ± 0.01*†  | 0.04 ± 0.01*† |               |               |  |    |  |               |  |    | 466.49 ± 44.65   |         |
| Malate       | fl/fl                  | Vehicle   | 42.00 ± 0.26            | 13.38 ± 0.75   | 21.59 ± 0.19   | 16.90 ± 0.81   | 6.13 ± 0.12   |               |               |  |    |  |               |  |    | 352.12 ± 69.71   |         |
|              |                        | AOA       | 41.75 ± 1.61            | 14.34 ± 0.48   | 23.57 ± 0.69†  | 13.28 ± 0.76†  | 7.06 ± 0.63   |               |               |  |    |  |               |  |    | 292.55 ± 66.95   |         |
|              | LS-Mpc2 <sup>-/-</sup> | Vehicle   | 54.38 ± 0.87*           | 12.94 ± 0.41   | 16.86 ± 0.23*  | 12.30 ± 0.29*  | 3.52 ± 0.83*  |               |               |  |    |  |               |  |    | 162.13 ± 13.95*  |         |
|              |                        | AOA       | 76.24 ± 1.36*†          | 10.33 ± 0.34*† | 8.00 ± 0.62*†  | 4.39 ± 0.30*†  | 1.04 ± 0.42*† |               |               |  |    |  |               |  |    | 95.61 ± 10.21*†  |         |
| αKG          | fl/fl                  | Vehicle   | 42.56 ± 5.88            | 9.15 ± 1.11    | 24.42 ± 2.89   | 11.80 ± 1.51   | 7.75 ± 0.22   | 4.32 ± 0.59   |               |  |    |  |               |  |    | 20.77 ± 1.80     |         |
|              |                        | AOA       | 34.36 ± 1.18            | 9.97 ± 0.78    | 28.35 ± 0.53   | 13.34 ± 0.27   | 9.22 ± 0.13†  | 4.76 ± 0.13   |               |  |    |  |               |  |    | 44.72 ± 4.77†    |         |
|              | LS-Mpc2 <sup>-/-</sup> | Vehicle   | 61.57 ± 4.69*           | 8.29 ± 1.66    | 17.65 ± 2.54*  | 7.04 ± 1.41*   | 3.82 ± 0.50*  | 1.63 ± 0.30*  |               |  |    |  |               |  |    | 11.33 ± 1.57*    |         |
|              |                        | AOA       | 69.42 ± 0.32*           | 8.17 ± 0.71    | 14.13 ± 0.57*  | 5.25 ± 0.05*   | 1.79 ± 0.23*† | 1.24 ± 0.33*  |               |  |    |  |               |  |    | 22.48 ± 2.97*†   |         |
| Alanine      | fl/fl                  | Vehicle   | 50.39 ± 0.21            | 6.04 ± 0.88    | 7.97 ± 0.76    | 37.07 ± 1.52   |               |               |               |  |    |  |               |  |    | 2.49 ± 0.20      |         |
|              |                        | AOA       | 57.64 ± 0.32†           | 2.03 ± 0.13†   | 3.86 ± 0.16†   | 37.85 ± 0.40   |               |               |               |  |    |  |               |  |    | 3.81 ± 0.16†     |         |
|              | LS-Mpc2 <sup>-/-</sup> | Vehicle   | 55.48 ± 1.19*           | 4.34 ± 0.20    | 5.64 ± 0.29*   | 35.92 ± 1.64   |               |               |               |  |    |  |               |  |    | 2.24 ± 0.16      |         |
|              |                        | AOA       | 61.86 ± 1.06*†          | 0.74 ± 0.05*†  | 0.96 ± 0.04*†  | 37.87 ± 1.11   |               |               |               |  |    |  |               |  |    | 2.91 ± 1.09      |         |
| Aspartate    | fl/fl                  | Vehicle   | 39.34 ± 0.33            | 11.58 ± 0.23   | 21.73 ± 0.25   | 20.98 ± 0.14   | 6.37 ± 0.22   |               |               |  |    |  |               |  |    | 7.64 ± 0.40      |         |
|              |                        | AOA       | 40.48 ± 1.54            | 12.77 ± 0.21†  | 24.06 ± 0.85†  | 15.66 ± 0.53†  | 7.03 ± 0.47   |               |               |  |    |  |               |  |    | 3.39 ± 0.26†     |         |
|              | LS-Mpc2 <sup>-/-</sup> | Vehicle   | 47.19 ± 1.46*           | 12.55 ± 0.27*  | 19.65 ± 0.60*  | 16.89 ± 0.19*  | 3.72 ± 0.65*  |               |               |  |    |  |               |  |    | 4.06 ± 0.93*     |         |
|              |                        | AOA       | 64.19 ± 0.99*†          | 12.06 ± 0.15*  | 14.01 ± 0.39*† | 8.00 ± 0.31*†  | 1.74 ± 0.19*† |               |               |  |    |  |               |  |    | 1.15 ± 0.33*†    |         |
| Glucose (μM) | fl/fl                  | Vehicle   | 24.61 ± 0.27            | 11.30 ± 0.36   | 22.04 ± 0.22   | 21.37 ± 0.11   | 9.52 ± 0.09   | 8.25 ± 0.23   | 2.91 ± 0.15   |  |    |  |               |  |    | 162.14 ± 4.59    |         |
|              |                        | AOA       | 24.24 ± 0.78            | 11.14 ± 0.40   | 21.72 ± 0.33   | 21.53 ± 0.11   | 9.91 ± 0.15†  | 8.42 ± 0.09   | 3.04 ± 0.11   |  |    |  |               |  |    | 141.48 ± 4.40    |         |
|              | LS-Mpc2 <sup>-/-</sup> | Vehicle   | 29.74 ± 0.44*           | 12.08 ± 0.15*  | 21.26 ± 0.13*  | 20.05 ± 0.03*  | 7.97 ± 0.14*  | 6.58 ± 0.07*  | 2.32 ± 0.03*  |  |    |  |               |  |    | 131.40 ± 4.44*   |         |
|              |                        | AOA       | 45.95 ± 0.94*†          | 12.53 ± 0.4*   | 16.93 ± 0.12*† | 15.31 ± 0.2*†  | 4.53 ± 0.19*† | 3.36 ± 0.03*† | 1.39 ± 0.09*† |  |    |  |               |  |    | 98.13 ± 11.41*†  |         |

\*  $p < 0.05$  WT vs KO within treatment

†  $p < 0.05$  Vehicle vs AOA within genotype

# Figure S1

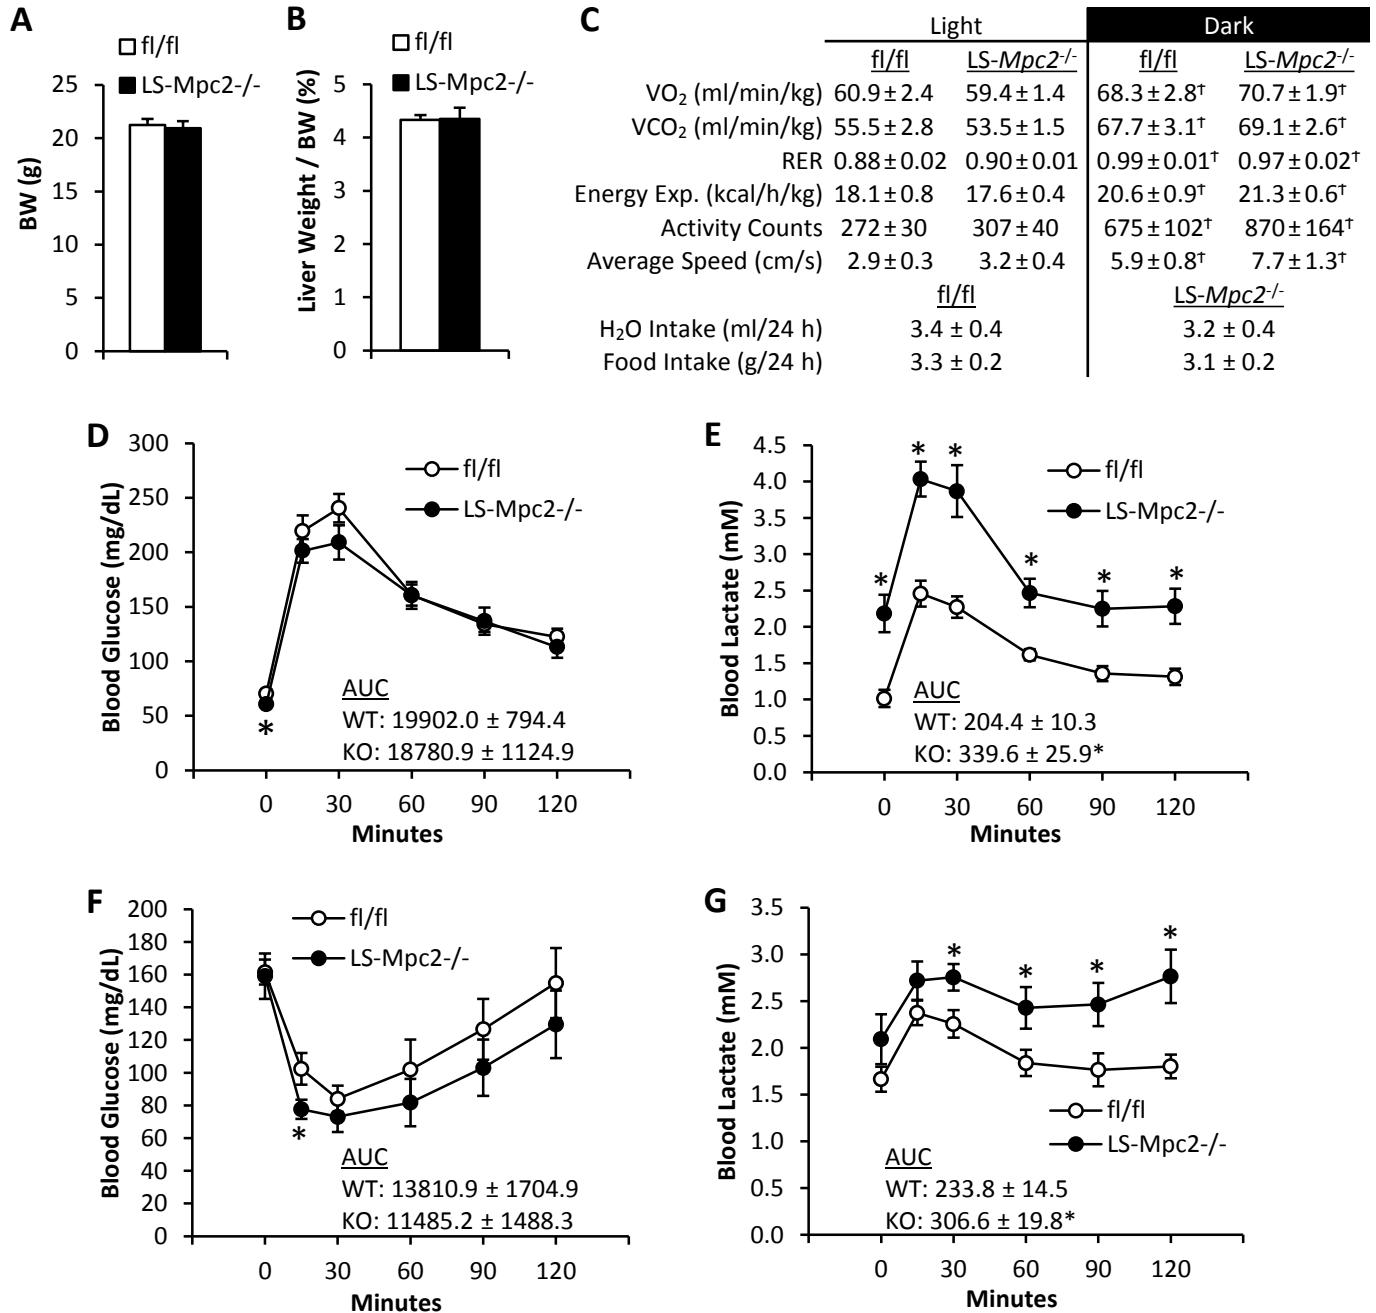

**Figure S2**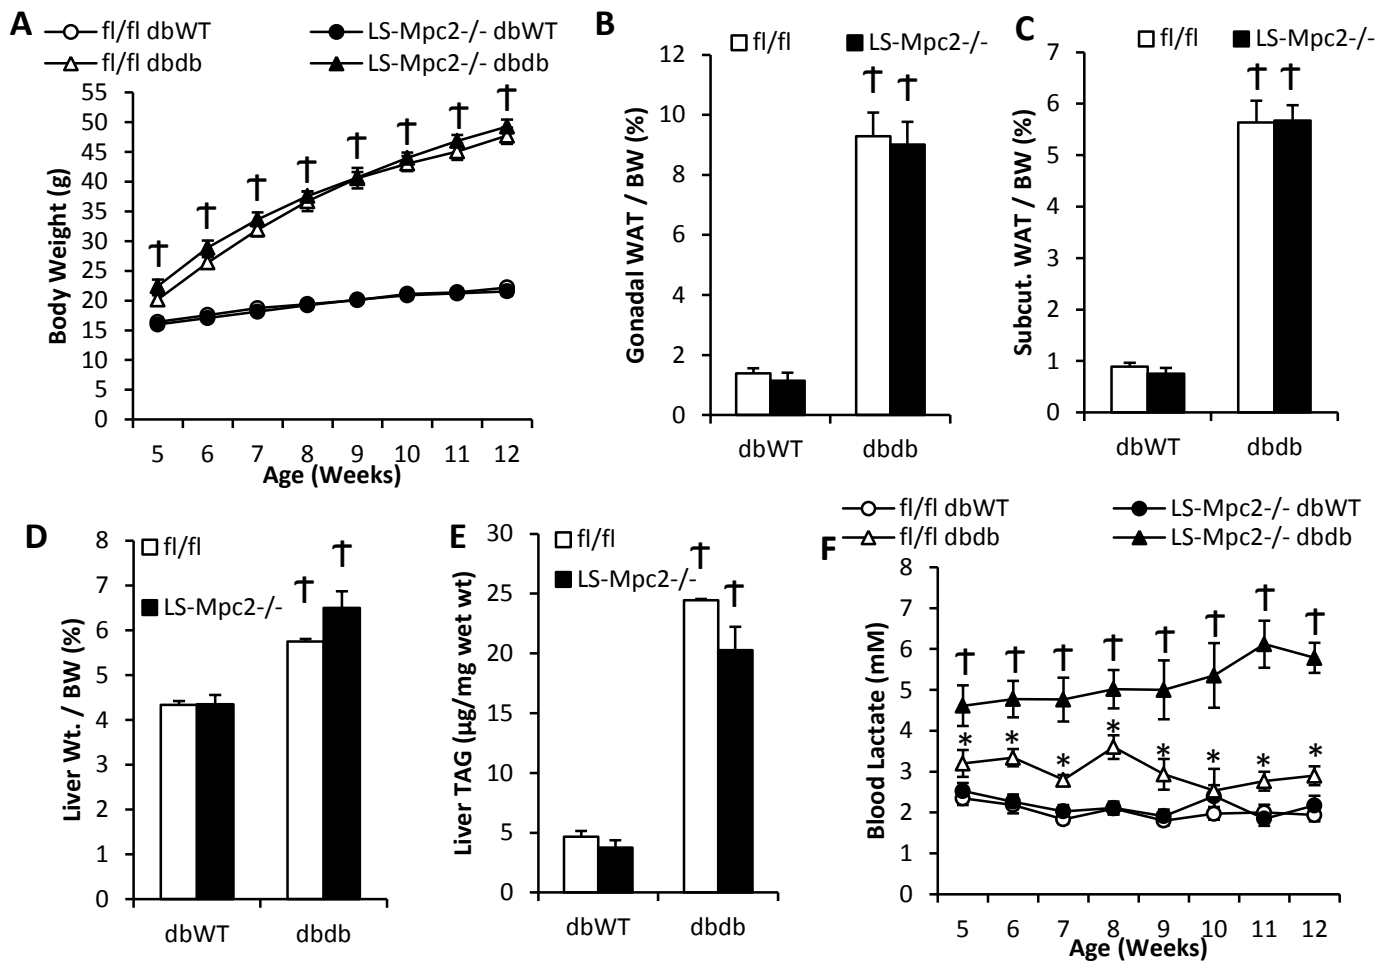

Supplement: NIHMS713382-supplement-1.pdf [file NIHMS713382-supplement-1.pdf]
